# Supplementary material for: Influence of cell spreading and contractility on stiffness measurements using AFM
Source: Royal Society of Chemistry journal article supplement (doi:10.1039/c2sm26348c), 2012-01-01
Supplement: c2sm26348c.pdf [file c2sm26348c.pdf]

**Supplementary material:** Influence of cell spreading and cell contractility on stiffness measurements using AFM

Shirish Vichare  
Department of Civil Engineering,  
Indian Institute of Technology Bombay,  
Mumbai India

Mandar M. Inamdar<sup>1</sup>  
Department of Civil Engineering,  
Indian Institute of Technology Bombay,  
Mumbai India

Shamik Sen<sup>2</sup>  
Department of Biosciences and Bioengineering,  
Indian Institute of Technology Bombay,  
Mumbai India

June 9, 2012

<sup>1</sup>minamdar@civil.iitb.ac.in

<sup>2</sup>shamiks@iitb.ac.in

## 1 Supplementary Figures

Cell Dimensions : Volume  $524\mu\text{m}^3$

| Cell Spread<br>$S$ ( $\mu\text{m}$ ) | Cell Height<br>$H$ ( $\mu\text{m}$ ) |
|--------------------------------------|--------------------------------------|
| 2                                    | 9.90                                 |
| 5                                    | 9.38                                 |
| 10                                   | 7.56                                 |
| 15                                   | 5.13                                 |
| 20                                   | 3.22                                 |

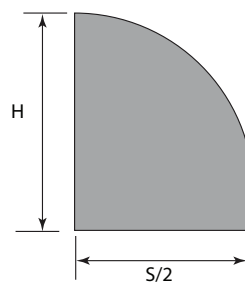

Fig. S1: Cell dimensions for different spread geometries subject to constant volume.

Nucleus Dimensions : Volume  $65.45\mu\text{m}^3$

| Cell Spread<br>$S$ ( $\mu\text{m}$ ) | Location of nucleus centre<br>$Y$ ( $\mu\text{m}$ ) | Equilateral radius<br>$r_1$ ( $\mu\text{m}$ ) | Polar radius<br>$r_2$ ( $\mu\text{m}$ ) |
|--------------------------------------|-----------------------------------------------------|-----------------------------------------------|-----------------------------------------|
| 2                                    | 4.95                                                | 2.5                                           | 2.5                                     |
| 5                                    | 4.69                                                | 2.5                                           | 2.5                                     |
| 10                                   | 3.78                                                | 2.5                                           | 2.5                                     |
| 15                                   | 2.56                                                | 2.75                                          | 2.07                                    |
| 20                                   | 1.61                                                | 3.39                                          | 1.36                                    |

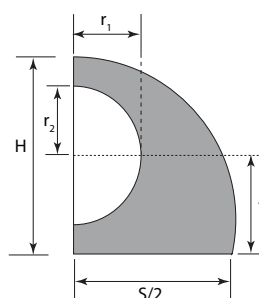

Fig. S2: Position and dimensions of the nucleus for different spread geometries subject to constant nuclear volume.

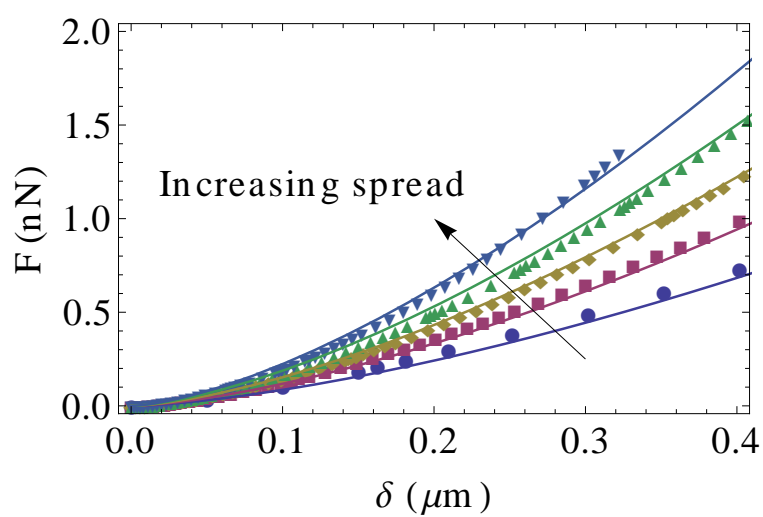

Fig. S3: Sample force displacement curves for various spread geometries and fitted with Hertz model.
